# Supplementary material for: Camrelizumab in combination with apatinib in second-line or above therapy for advanced primary liver cancer: cohort A report in a multicenter phase Ib/II trial
Source: PubMed Central journal article supplement — J Immunother Cancer. 2021 Mar 19;9(3):e002191. doi: 10.1136/jitc-2020-002191 (PMC7986650; doi:10.1136/jitc-2020-002191), 2021-03-19
Supplement: jitc-2020-002191supp001.pdf [file jitc-2020-002191supp001.pdf]

**Table S1 Treatment interruption and dose reduction due to treatment-related adverse events (TRAEs).**

|                                            | <b>Camrelizumab<br/>+ Apatinib 125<br/>mg (n=3)</b> | <b>Camrelizumab<br/>+ Apatinib 250<br/>mg (n=3)</b> | <b>Camrelizumab<br/>+ Apatinib 375<br/>mg (n=19)</b> | <b>Camrelizumab<br/>+ Apatinib 500<br/>mg (n=3)</b> | <b>All patients<br/>(n=28)</b> |
|--------------------------------------------|-----------------------------------------------------|-----------------------------------------------------|------------------------------------------------------|-----------------------------------------------------|--------------------------------|
| <b>Treatment interruption due to TRAEs</b> |                                                     |                                                     |                                                      |                                                     |                                |
| Total                                      | 2 (66.7)                                            | 2 (66.7)                                            | 10 (52.6)                                            | 1 (33.3)                                            | 15 (53.6)                      |
| Aspartate aminotransferase increased       | 1 (33.3)                                            | 1 (33.3)                                            | 2 (10.5)                                             | 0                                                   | 4 (14.3)                       |
| Alanine aminotransferase increased         | 1 (33.3)                                            | 0                                                   | 2 (10.5)                                             | 0                                                   | 3 (10.7)                       |
| Bilirubin conjugated increased             | 2 (66.7)                                            | 1 (33.3)                                            | 0                                                    | 0                                                   | 3 (10.7)                       |
| Blood bilirubin increased                  | 2 (66.7)                                            | 0                                                   | 1 (5.3)                                              | 0                                                   | 3 (10.7)                       |
| Platelet count decreased                   | 1 (33.3)                                            | 0                                                   | 2 (10.5)                                             | 0                                                   | 3 (10.7)                       |
| Gamma-glutamyltransferase increased        | 1 (33.3)                                            | 0                                                   | 1 (5.3)                                              | 0                                                   | 2 (7.1)                        |
| Blood alkaline phosphatase increased       | 1 (33.3)                                            | 0                                                   | 1 (5.3)                                              | 0                                                   | 2 (7.1)                        |
| White blood cell count decreased           | 0                                                   | 0                                                   | 1 (5.3)                                              | 0                                                   | 1 (3.6)                        |
| Amylase increased                          | 0                                                   | 0                                                   | 1 (5.3)                                              | 0                                                   | 1 (3.6)                        |
| Lipase increased                           | 0                                                   | 0                                                   | 1 (5.3)                                              | 0                                                   | 1 (3.6)                        |
| Proteinuria                                | 0                                                   | 1 (33.3)                                            | 1 (5.3)                                              | 0                                                   | 2 (7.1)                        |

|                                    |   |   |         |          |         |
|------------------------------------|---|---|---------|----------|---------|
| Immune-mediated hepatitis          | 0 | 0 | 1 (5.3) | 0        | 1 (3.6) |
| Herpes zoster                      | 0 | 0 | 1 (5.3) | 0        | 1 (3.6) |
| Pneumonitis                        | 0 | 0 | 1 (5.3) | 0        | 1 (3.6) |
| Hypothyroidism                     | 0 | 0 | 1 (5.3) | 0        | 1 (3.6) |
| Rash                               | 0 | 0 | 0       | 1 (33.3) | 1 (3.6) |
| Pyrexia                            | 0 | 0 | 1 (5.3) | 0        | 1 (3.6) |
| Upper gastrointestinal hemorrhage  | 0 | 0 | 1 (5.3) | 0        | 1 (3.6) |
| Hypertension                       | 0 | 0 | 1 (5.3) | 0        | 1 (3.6) |
| Anemia                             | 0 | 0 | 1 (5.3) | 0        | 1 (3.6) |
| <b>Dose reduction due to TRAEs</b> |   |   |         |          |         |
| Total                              | 0 | 0 | 1 (5.3) | 0        | 1 (3.6) |
| Pain in extremity                  | 0 | 0 | 1 (5.3) | 0        | 1 (3.6) |

Data are shown in n (%).

**Table S2 Immune-related adverse events.**

|                                                 | Camrelizumab +<br>Apatinib 125 mg<br>(n=3) |             | Camrelizumab +<br>Apatinib 250 mg<br>(n=3) |             | Camrelizumab +<br>Apatinib 375 mg<br>(n=19) |             | Camrelizumab +<br>Apatinib 500 mg<br>(n=3) |             | All patients (n=28) |             |
|-------------------------------------------------|--------------------------------------------|-------------|--------------------------------------------|-------------|---------------------------------------------|-------------|--------------------------------------------|-------------|---------------------|-------------|
|                                                 | Any<br>grade                               | Grade<br>≥3 | Any<br>grade                               | Grade<br>≥3 | Any<br>grade                                | Grade<br>≥3 | Any<br>grade                               | Grade<br>≥3 | Any<br>grade        | Grade<br>≥3 |
| <b>Total</b>                                    | 0                                          | 0           | 3 (100)                                    | 0           | 6 (31.6)                                    | 2 (10.5)    | 2 (66.7)                                   | 1 (33.3)    | 11 (39.3)           | 3 (10.7)    |
| Aspartate aminotransferase<br>increased         | 0                                          | 0           | 1 (33.3)                                   | 0           | 1 (5.3)                                     | 1 (5.3)     | 0                                          | 0           | 2 (7.1)             | 1 (3.6)     |
| Hypothyroidism                                  | 0                                          | 0           | 0                                          | 0           | 1 (5.3)                                     | 0           | 1 (33.3)                                   | 0           | 2 (7.1)             | 0           |
| Reactive capillary<br>endothelial proliferation | 0                                          | 0           | 0                                          | 0           | 2 (10.5)                                    | 0           | 0                                          | 0           | 2 (7.1)             | 0           |
| Gamma-glutamyltransferase<br>increased          | 0                                          | 0           | 0                                          | 0           | 1 (5.3)                                     | 1 (5.3)     | 0                                          | 0           | 1 (3.6)             | 1 (3.6)     |
| Alanine aminotransferase<br>increased           | 0                                          | 0           | 0                                          | 0           | 1 (5.3)                                     | 1 (5.3)     | 0                                          | 0           | 1 (3.6)             | 1 (3.6)     |
| Lymphocyte count                                | 0                                          | 0           | 0                                          | 0           | 1 (5.3)                                     | 1 (5.3)     | 0                                          | 0           | 1 (3.6)             | 1 (3.6)     |

|                                       |   |   |          |   |         |         |          |          |         |         |
|---------------------------------------|---|---|----------|---|---------|---------|----------|----------|---------|---------|
| decreased                             |   |   |          |   |         |         |          |          |         |         |
| Blood alkaline phosphatase increased  | 0 | 0 | 0        | 0 | 1 (5.3) | 0       | 0        | 0        | 1 (3.6) | 0       |
| Blood lactate dehydrogenase increased | 0 | 0 | 0        | 0 | 1 (5.3) | 0       | 0        | 0        | 1 (3.6) | 0       |
| Platelet count decreased              | 0 | 0 | 1 (33.3) | 0 | 0       | 0       | 0        | 0        | 1 (3.6) | 0       |
| Immune-mediated hepatitis             | 0 | 0 | 0        | 0 | 1 (5.3) | 0       | 0        | 0        | 1 (3.6) | 0       |
| Herpes zoster                         | 0 | 0 | 0        | 0 | 1 (5.3) | 0       | 0        | 0        | 1 (3.6) | 0       |
| Pneumonitis                           | 0 | 0 | 0        | 0 | 1 (5.3) | 1 (5.3) | 0        | 0        | 1 (3.6) | 1 (3.6) |
| Hyperthyroidism                       | 0 | 0 | 1 (33.3) | 0 | 0       | 0       | 0        | 0        | 1 (3.6) | 0       |
| Rash                                  | 0 | 0 | 0        | 0 | 0       | 0       | 1 (33.3) | 1 (33.3) | 1 (3.6) | 1 (3.6) |
| Pyrexia                               | 0 | 0 | 0        | 0 | 1 (5.3) | 0       | 0        | 0        | 1 (3.6) | 0       |
| Proteinuria                           | 0 | 0 | 1 (33.3) | 0 | 0       | 0       | 0        | 0        | 1 (3.6) | 0       |

Data are shown in n (%).
